# Supplementary material
Source: PubMed Central journal article supplement (PMC6629099)
Supplement: jciinsight-4-127527-s227.pdf [file jciinsight-4-127527-s227.pdf]

**Supplementary Figure 1: Analysis of lymphocyte phenotype and differentiation stratified by time post HSCT**

PBMCs from healthy donors (n=22-24), untransplanted DOCK8-deficient patients (n=7-9), or DOCK8-deficient patients at 0-11 (n=10), 12-22 (n=6) or 23-43 months (n=3-4) following HSCT were labelled with mAbs against CD3, CD4, CD8, CD20, CD45RA, CCR7, CD10, CD27, CD28, CD56, CD57, CD127, PD1, TCR $\alpha\beta$ , TCR $\gamma\delta$ , TCRV $\alpha$ 24, TCRV $\beta$ 11, CD161 and TCR $\alpha$ V.2.

Proportions of (A) CD3<sup>+</sup> cells, CD4<sup>+</sup> T cells (CD3<sup>+</sup>CD4<sup>+</sup>), CD8<sup>+</sup> T cells (CD3<sup>+</sup>CD8<sup>+</sup>), B cells (CD20<sup>+</sup>); (B) transitional, naïve and memory B cell subsets; (C) CD4<sup>+</sup> naïve, T<sub>CM</sub> and T<sub>EM</sub> cell subsets; (D) CD8<sup>+</sup> naïve, T<sub>CM</sub>, T<sub>EM</sub> and T<sub>EMRA</sub> cell subsets; (E) αβ and γδ TCR<sup>+</sup> T cells; (F) MAIT cells; (G) NK cells; (H) NKT cells; (I) memory CD4<sup>+</sup> T cell (CD4<sup>+</sup>CD8<sup>-</sup>CD45RA<sup>-</sup>CCR7<sup>±</sup>) and (J) CD8<sup>+</sup> T<sub>EM</sub> cell expression of PD1, CD57, CD27, CD28 and CD127 were then determined by flow cytometric analysis. Data are the mean ± SEM. Statistics performed using Prism unpaired t-test with Welch's correction \*<0.05, \*\*<0.01, \*\*\*<0.005, \*\*\*\*<0.001.

**Supplementary Figure 2: Analysis of intracellular cytokine expression by DOCK8-deficient CD4<sup>+</sup> T cells: effect of cell division**

Naïve and memory CD4<sup>+</sup> T cells were sort-purified from the peripheral blood of healthy donors (n=13-25), untransplanted DOCK8-deficient patients (n=2-7), or DOCK8-deficient patients following HSCT (DOCK8 pHST; n=8-18). The cells were labelled with CFSE and then cultured under Th0 (TAE beads; memory) or Th1 (+IL-12) conditions (naïve). After five days, cells were restimulated with PMA/ionomycin before permeabilization and intracellular staining to determine (A) proportions of memory CD4<sup>+</sup> T cells expressing Th1 (IFNγ and TNFα) or Th2 cytokines (IL4 and IL13); (B) proportions of naïve CD4<sup>+</sup> T cells expressing IFNγ and the proportions of (C) memory or (D) naïve CD4<sup>+</sup> T cells expressing IFNγ and IL-21 in each division interval as determined by dilution of CFSE. The data represent the mean ± SEM of cytokine positive cells, or cytokine-expressing cells in each division. Statistics performed using Prism unpaired t-test with Welch's correction \*<0.05, \*\*<0.01, \*\*\*<0.005, \*\*\*\*<0.001.

**Supplementary Figure 3: Changes observed in paired pre- and post-transplant DOCK8-deficient patients are consistent with those seen at the cohort level.**

PBMCs from healthy donors (red columns), and DOCK8-deficient patients before (blue dots), or following HSCT (DOCK8 pHST) (green dots) were labelled with mAbs against CD3, CD4, CD8,

CD20, CD56, CD45RA, CCR7, CD10, CD27, IgG, IgA, TCR  $\alpha\beta$ , TCR  $\gamma\delta$ , TCR V $\alpha$ 24, TCR V $\beta$ 11, CD161, TCR V $\alpha$ 7.2, PD1, CD57, CD27, CD28 and CD127. Proportions of:

(A) CD3<sup>+</sup> cells, CD4<sup>+</sup> T cells (CD3<sup>+</sup>CD4<sup>+</sup>), CD8<sup>+</sup> T cells (CD3<sup>+</sup>CD8<sup>+</sup>), B cells (CD20<sup>+</sup>);

(B) transitional, naive and memory B cell subsets;

(C) CD4<sup>+</sup> and (D) CD8<sup>+</sup> naïve, T<sub>CM</sub>, T<sub>EM</sub> and T<sub>EMRA</sub> cell subsets; and

(E) memory CD4<sup>+</sup> T cells and (F) T<sub>EM</sub> CD8<sup>+</sup> T cells expressing PD1, CD57, CD27, CD28 and CD127 were determined.

(G) Memory CD4<sup>+</sup> T cells were sort-purified from healthy donors, untransplanted DOCK8-deficient patients, or DOCK8-deficient patients following HSCT, and cultured with TAE beads. After five days, the proportions of cells expressing Th1 (IFN $\gamma$ , TNF $\alpha$ ) and Th2 (IL-4, IL-13) cytokines, and the Th2/Th1 ratio were determined.

(H) CD8<sup>+</sup> T cells were sorted from healthy donors, untransplanted DOCK8-deficient patients, or DOCK8-deficient patients following HSCT and cultured with TAE beads. Secretion of IFN $\gamma$ , TNF $\alpha$ , and IL-2 was determined after 5 days by cytometric bead arrays.

Data presented is from healthy controls (n=21-25) and patients with both a pre- and post-transplant sample (n=4-6), with data from individual patients joined by a line. Statistics performed using Prism paired t-test or unpaired t-test with Welch's correction \*<0.05, \*\*<0.01, \*\*\*<0.005, \*\*\*\*<0.001.

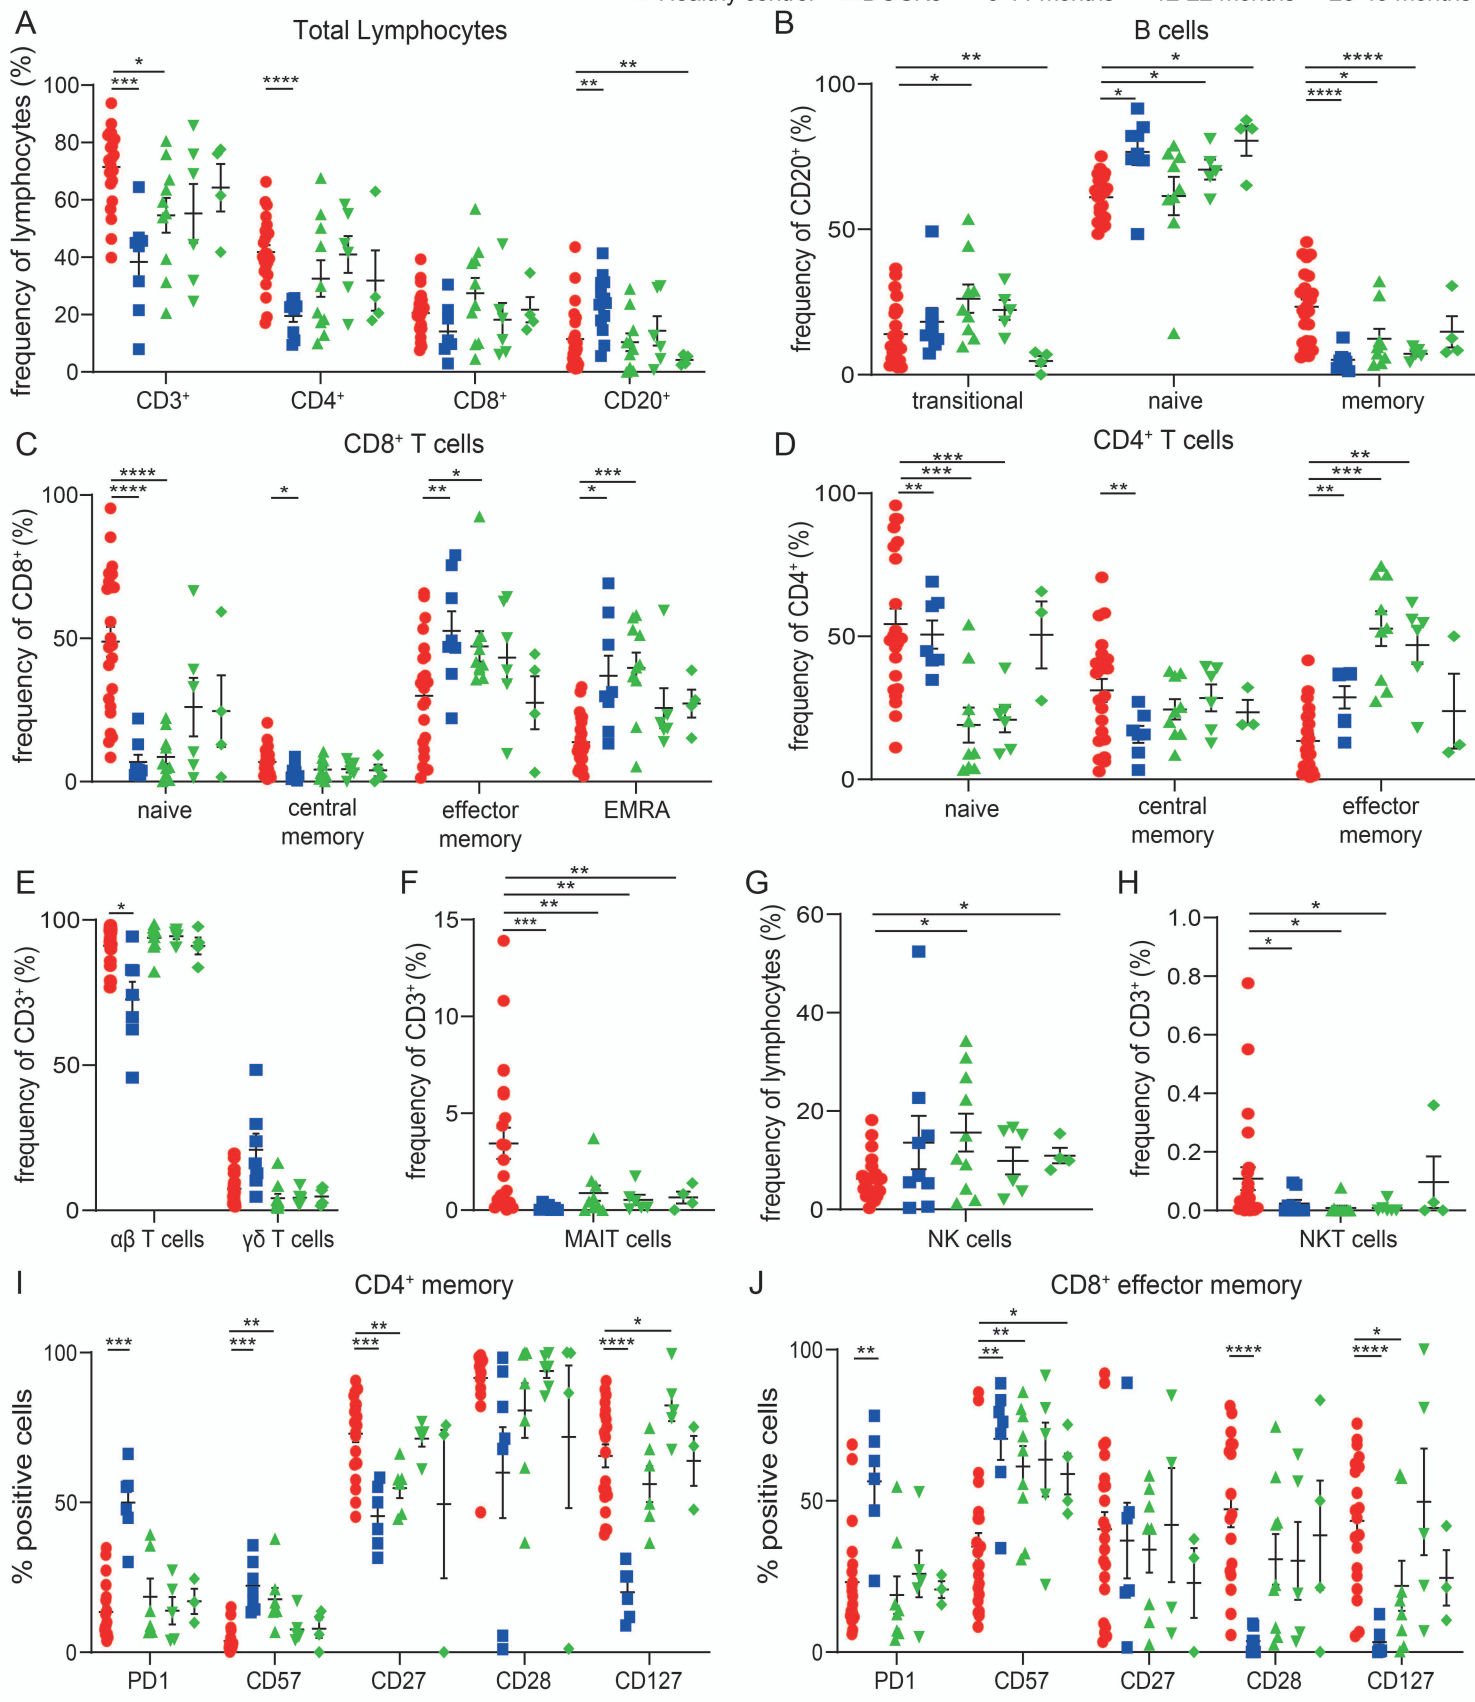

A Memory CD4<sup>+</sup> T cells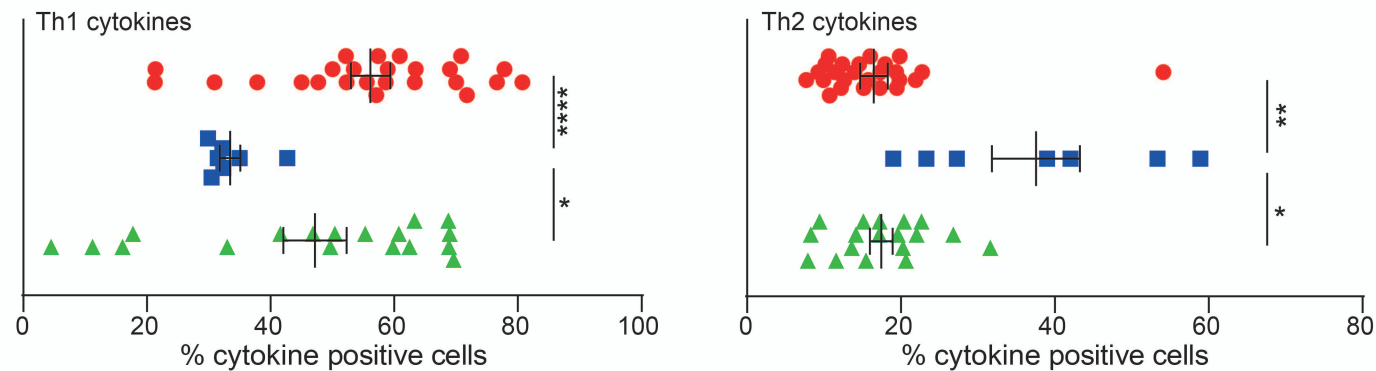B Naive CD4<sup>+</sup> Th1 cells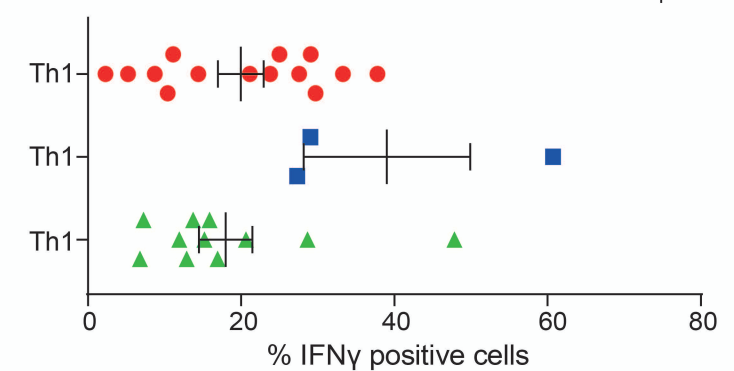C Memory CD4<sup>+</sup> T cells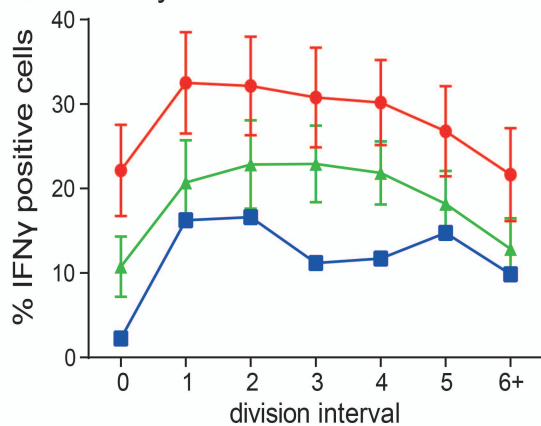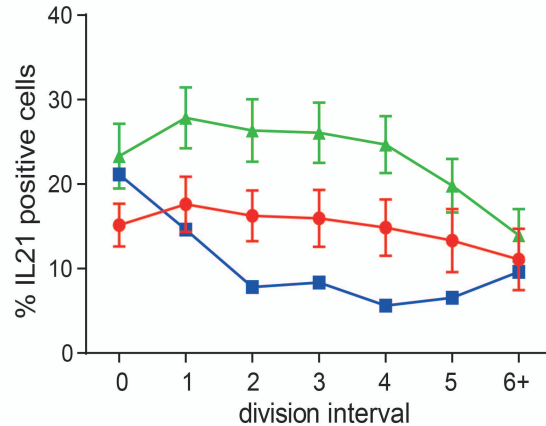D Naive CD4<sup>+</sup> Th1 cells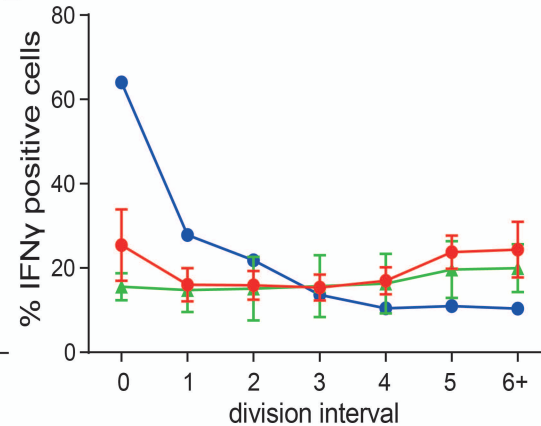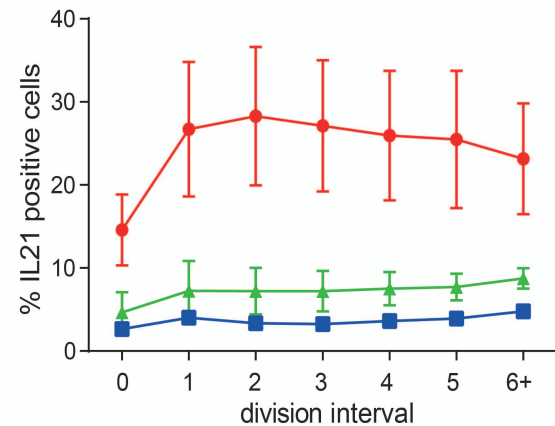

● Healthy control  
 ■ DOCK8  
 ▲ DOCK8 pHSCT

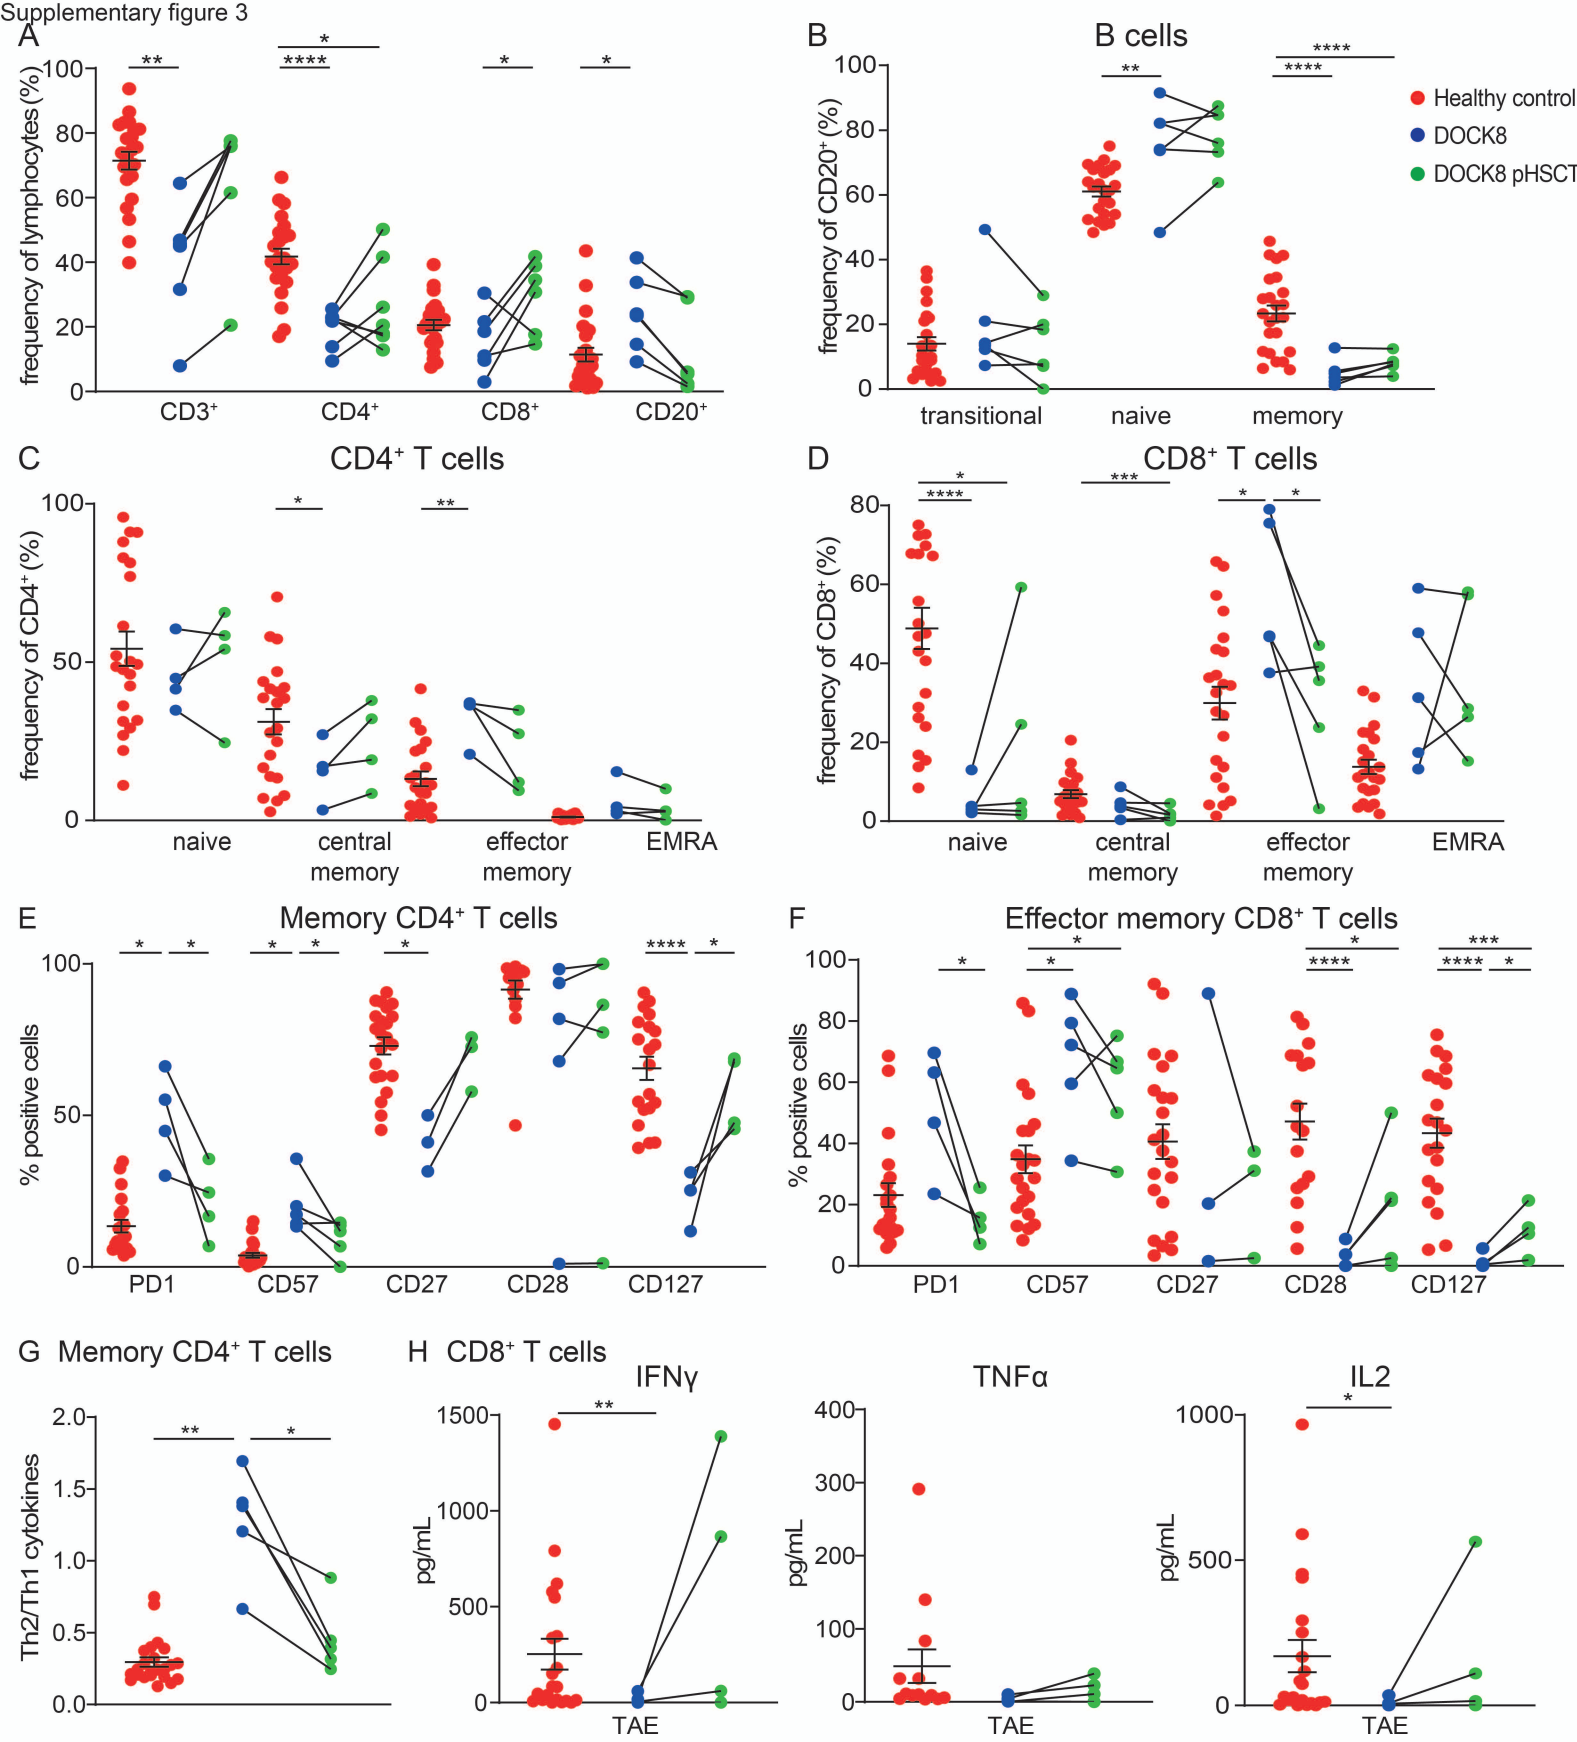

**Supplementary Table 1: Antibodies and reagents used**

| Target-Fluorochrome           | Clone       | Supplier                   |
|-------------------------------|-------------|----------------------------|
| CCR7-FITC                     | 150503      | R&D Systems                |
| CCR7-PECy7                    | G043H7      | BioLegend                  |
| CD107a-AF647                  | H4A3        | BioLegend                  |
| CD10-APC                      | HI10a       | Becton Dickson Biosciences |
| CD10-BUV737                   | HI10a       | Becton Dickson Biosciences |
| CD127-BV421                   | A019D5      | BioLegend                  |
| CD127-BV650                   | A019D5      | BioLegend                  |
| CD161-PerCPCy5.5              | HP-3G10     | eBioscience                |
| CD20-BUV395                   | 2H7         | Becton Dickson Biosciences |
| CD20-PE                       | L27         | Becton Dickson Biosciences |
| CD25-FITC                     | 2A3         | Becton Dickson Biosciences |
| CD25-PE                       | M-A251      | Becton Dickson Biosciences |
| CD25-PECy7                    | M-A251      | Becton Dickson Biosciences |
| CD27-BV786                    | L128        | Becton Dickson Biosciences |
| CD27-PECy7                    | M-T271      | Becton Dickson Biosciences |
| CD28-PerCPCy5.5               | CD28.2      | Becton Dickson Biosciences |
| CD3-BV421                     | UCHT1       | Becton Dickson Biosciences |
| CD3-BV786                     | UCHT1       | Becton Dickson Biosciences |
| CD45RA-BV605                  | HI100       | Becton Dickson Biosciences |
| CD45RA-PerCPCy5.5             | HI100       | eBioscience                |
| CD4-APCCy7                    | RPA-T4      | Becton Dickson Biosciences |
| CD4-BUV395                    | SK3 (Leu3a) | Becton Dickson Biosciences |
| CD4-BUV737                    | SK3 (Leu3a) | Becton Dickson Biosciences |
| CD4-PacBlue                   | OKT4        | eBioscience                |
| CD56-BV605                    | HDC56       | BioLegend                  |
| CD57-FITC                     | NK-1        | Becton Dickson Biosciences |
| CD8-APC                       | 2ST8.5H7    | Becton Dickson Biosciences |
| CD8-BUV395                    | RPA-T8      | Becton Dickson Biosciences |
| CD8-PECy7                     | RPA-T8      | Becton Dickson Biosciences |
| CD8-PerCPCy5.5                | RPA-T8      | Becton Dickson Biosciences |
| CD95-PECF594                  | DX2         | Becton Dickson Biosciences |
| DOCK8                         | G-2         | Santa Cruz Biotechnology   |
| GranzymeB-AF700               | GB11        | Becton Dickson Biosciences |
| IFN $\gamma$ -BV605           | B27         | Becton Dickson Biosciences |
| IgD-PE                        | IA6-2       | Becton Dickson Biosciences |
| IgG1 $\kappa$ isotype control | P3.6.2.8.1  | eBioscience                |
| IgG-APC                       | G18-145     | Becton Dickson Biosciences |
| IgM-FITC                      | G20-127     | Becton Dickson Biosciences |
| IL13-BV421                    | JES10-5A2   | Becton Dickson Biosciences |
| IL17A-APCCy7                  | BL168       | BioLegend                  |
| IL17F-BV786                   | O33-782     | Becton Dickson Biosciences |

|                                              |            |                                                  |
|----------------------------------------------|------------|--------------------------------------------------|
| IL21-ef660                                   | eBio3A3-N2 | eBioscience                                      |
| IL2-BV650                                    | MQ1-17H12  | Becton Dickson Biosciences                       |
| IL4-PECy7                                    | 8D4-8      | eBioscience                                      |
| PD1-Biotin                                   | eBioJ105   | eBioscience                                      |
| Streptavidin-BV421                           | N/A        | BioLegend                                        |
| TCR $\alpha\beta$ -PECy7                     | IP26       | BioLegend                                        |
| TCR $\gamma\delta$ -PerCPe710                | B1.1       | eBioscience                                      |
| TCRV $\alpha$ 24-FITC                        | C15        | Beckman Coulter                                  |
| TCRV $\alpha$ 7.2-BV421                      | 3C10       | BioLegend                                        |
| TCRV $\beta$ 11-PE                           | C21        | Beckman Coulter                                  |
| TNF $\alpha$ -BUV395                         | MAb11      | Becton Dickson Biosciences                       |
| anti-mouse IgG1-PE                           | G18-145    | Becton Dickson Biosciences                       |
| <b>Reagent</b>                               |            | <b>Supplier</b>                                  |
| ABTS                                         |            | Sigma-Aldrich                                    |
| anti-human IgM/IgG/IgA antisera              |            | Southern Biotech                                 |
| Brefeldin A                                  |            | Sigma-Aldrich                                    |
| calibrite beads                              |            | Becton Dickson Biosciences                       |
| Carboxyfluorescein succinimidyl ester (CFSE) |            | Invitrogen                                       |
| CD40L                                        |            | R&D Systems                                      |
| CpG 2006                                     |            | Sigma-Aldrich                                    |
| cytometric bead array (CBA)                  |            | Becton Dickson Biosciences                       |
| HA peptide                                   |            | R&D Systems                                      |
| HRP-streptavidin                             |            | Jackson ImmunoResearch                           |
| Ig standards                                 |            | Sigma-Aldrich                                    |
| Ionomycin                                    |            | Sigma-Aldrich                                    |
| monensin                                     |            | eBioscience                                      |
| Paansorbin cells (SAC-Cowan I strain)        |            | Millipore                                        |
| Phorbol 12-myristate 13-acetate (PMA)        |            | Sigma-Aldrich                                    |
| Prostaglandin E2                             |            | Sigma-Aldrich                                    |
| recombinant human IL12                       |            | R&D Systems                                      |
| recombinant human IL-1 $\beta$               |            | PeptoTech                                        |
| recombinant human IL2                        |            | Millipore                                        |
| recombinant human IL-21                      |            | PeptoTech                                        |
| recombinant human IL-23                      |            | PeptoTech                                        |
| recombinant human IL-4                       |            | Dr Rene de Waal Malfyt (DNAX Research Institute) |
| recombinant human IL-6                       |            | PeptoTech                                        |
| recombinant human TGF- $\beta$               |            | PeptoTech                                        |
| saponin                                      |            | Sigma-Aldrich                                    |
| T-cell activation and expansion (TAE) beads  |            | Miltenyi Biotech                                 |
| Zenon mouse IgG1 labeling kit                |            | Thermo Fischer Scientific                        |
| Zombie aqua fixable dye                      |            | BioLegend                                        |



AF, Alexa fluor; APC, allophycocyanin; BUV, brilliant ultra violet; BV, brilliant violet; FITC, fluorescein isothiocyanate; PE, phycoerythrin; PerCP, peridinin-chlorophyll-protein complex.
